# Supplementary material for: Genetically diverse CC-founder mouse strains replicate the human influenza gene expression signature
Source: PubMed Central journal article supplement (PMC4872221; doi:10.1038/srep26437), 2016-05-19
Supplement: srep26437-s1.pdf [file srep26437-s1.pdf]

1 **Supplemental material**

2

3 **Genetically diverse CC-founder mouse strains replicate the human influenza gene**  
4 **expression signature profile**

5

6 **Author affiliations**

7

8 Husni Elbahesh<sup>1</sup> and Klaus Schughart<sup>1,2,3,4</sup>

9 *<sup>1</sup>University of Tennessee Health Science Center, Memphis, Tennessee, United States of*  
10 *America*

11 *<sup>2</sup>Department of Infection Genetics, Helmholtz Centre for Infection Research, Braunschweig*

12 *<sup>3</sup>University of Veterinary Medicine Hannover, Hannover, Germany*

13 *<sup>4</sup>Corresponding author at: Helmholtz Centre for Infection Research, Dept. of Infection Genetics,*  
14 *Inhoffenstr.7, D-38124 Braunschweig*

15 *E-mail address: klaus.schughart@helmholtz-hzi.de*

16

17

18 **Supplemental Figures**

19

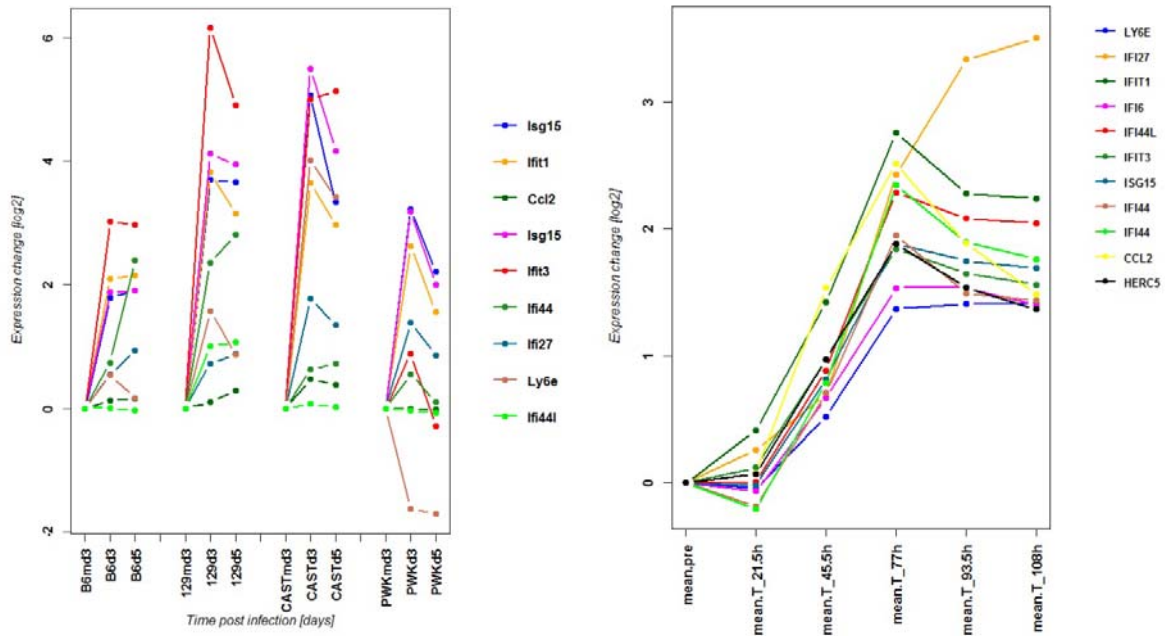

20

21 *Figure S1: Changes in the expression levels of top 10 signature genes in mice and humans*

22 Left panel: Expression values of normalized  $\log_2$  transformed signal intensities in the blood of  
 23 H1N1 infected mice at different time points p.i. relative to expression levels in mock-infected  
 24 control mice. Please note that less than 10 genes are shown for mice because not all human  
 25 genes had orthologues represented on the mouse expression array. Mock-infected control mice  
 26 are designated 'md3', infected mouse groups are labelled 'd3' and 'd5' representing the time  
 27 points p.i. Mouse strains: B6: C57BL/6J; 129: 129S1/SvImJ; CAST: CAST/EiJ; PWK: PWK/PhJ.

28 Right panel: Expression values of normalized  $\log_2$  transformed signal intensities in the blood of  
 29 infected human volunteers at different time points p.i. relative to expression levels in control  
 30 samples before infection (pre.chal.basel'). 'T' designates samples from infected patients at the  
 31 indicated time points. Infections were performed in humans with two IAV substrains, H1N1 and  
 32 H3N2.

33

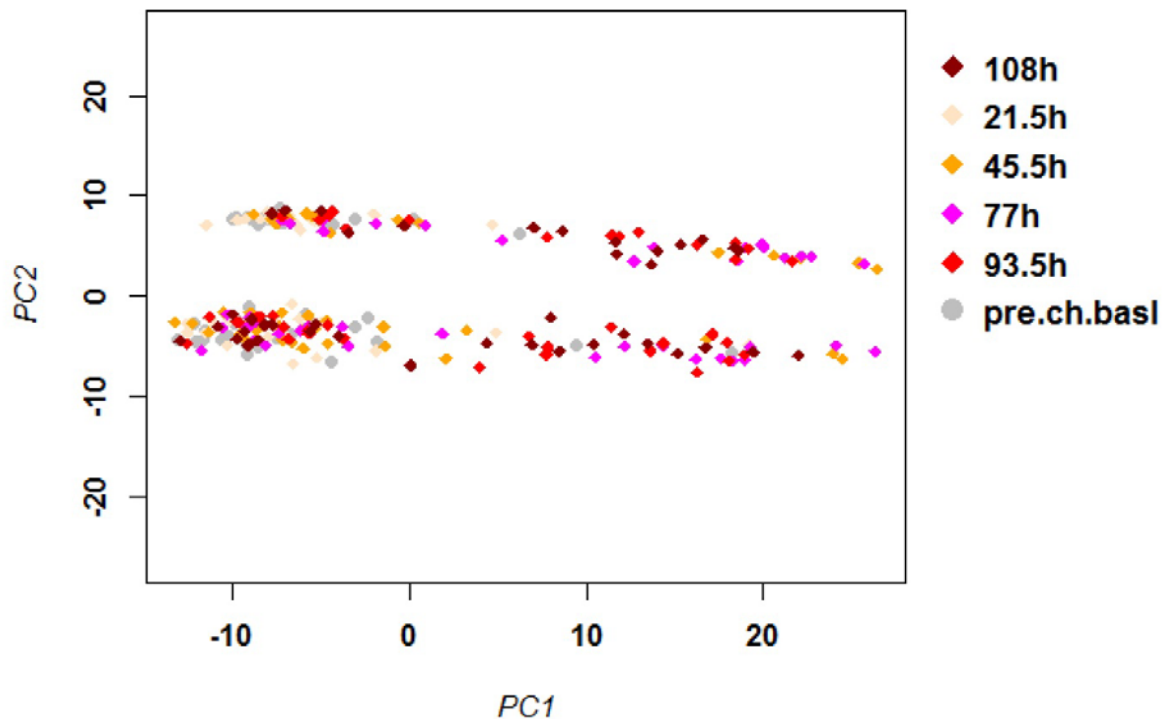

34

35 *Figure S2: PCA analysis of signature gene expression values in the blood of human volunteers*

36 Principle component analysis (PCA) was performed with normalized  $\log_2$ -transformed  
 37 expression values for the signature genes identified in infected human volunteers (including  
 38 *XIST*)<sup>1</sup>. Horizontal and vertical axis represent principle component 1 and 2, respectively. The  
 39 first two principal components represent 71 % and 16 %, respectively, of the total variation. Dots  
 40 represent individual samples from patients at the indicated times p.i. Colors represent the non-  
 41 infected samples and samples from different time points p.i. Note the two distinct groups (males  
 42 and females) separated by PC2 which is due to inclusion of *XIST* as a signature gene.

43

44

45 **Supplemental Tables**

46 *Table S1: Signature gene list from table S4 from<sup>1</sup>.*

47 *Table S2: Mouse signature genes that were identical by name to the human signature genes*  
48 *(Table S1) and represented on the microarray.*

49

50 **References**

51 1 Woods, C. W. *et al.* A host transcriptional signature for presymptomatic detection of  
52 infection in humans exposed to influenza H1N1 or H3N2. *PLoS One* **8**, e52198,  
53 doi:10.1371/journal.pone.0052198 (2013).

54
